# Supplementary material
Source: PubMed Central journal article supplement (PMC3121400)
Supplement: supp_M110.213512_jbc.M110.213512-1.pdf [file supp_M110.213512_jbc.M110.213512-1.pdf]

*Supplementary Material-*

| <b>RedJ Variant</b> | <b>Decanoyl-RedQ</b> | <b>Acetyl-RedQ</b> |
|---------------------|----------------------|--------------------|
| Wild-Type           | 100                  | 100                |
| L150N               | ND*                  | ND                 |
| V158T               | 39.8±1.6             | 49±5.3             |
| L162N               | ND                   | ND                 |
| L187N               | ND                   | ND                 |
| I215N               | ND                   | ND                 |

Table S1. Activity of RedJ<sub>FL</sub> variants with substitutions in the hydrophobic pocket. The activities were determined as in Figure S5 using full-length RedJ. Errors represent the spread of results in three replicate experiments.

\*No detectable activity.

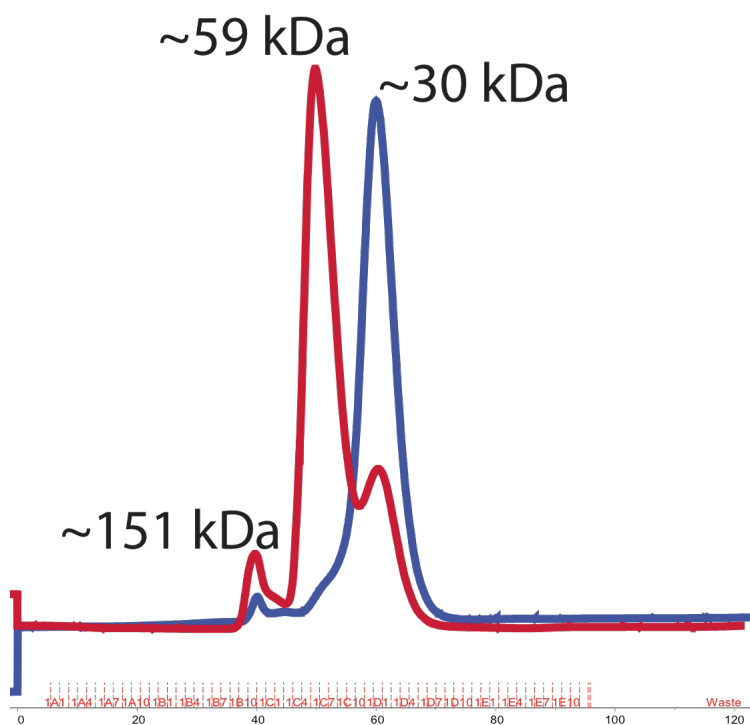

Figure S1. Elution chromatograms of RedJ<sub>FL</sub> (blue) and RedJ<sub>T</sub> (red) from an S100 gel filtration column. The apparent molecular weights indicate that RedJ<sub>FL</sub> is a monomer (apparent molecular weight 30 kDa) while the majority of RedJ<sub>T</sub> is a dimer (apparent molecular weight 59 kDa).

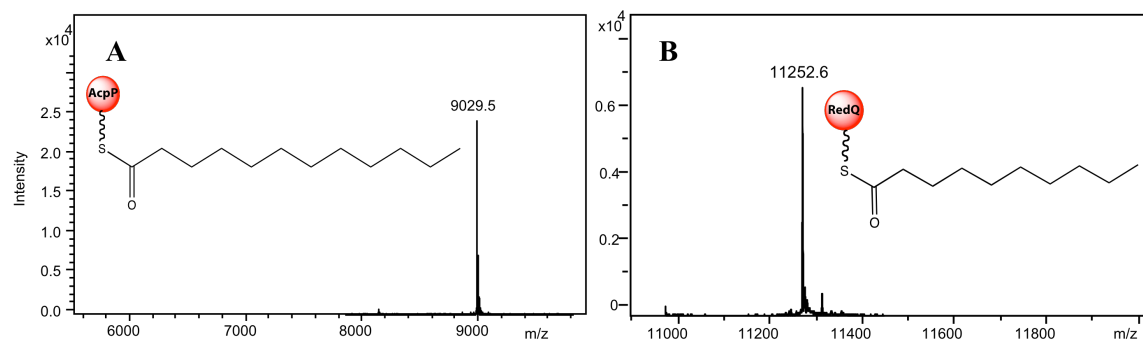

Figure S2. Deconvoluted ESI mass spectrum of products of Sfp reaction with (A): apo-AcpP and dodecanoyl-CoA, (B) apo-RedQ and decanoyl-CoA.

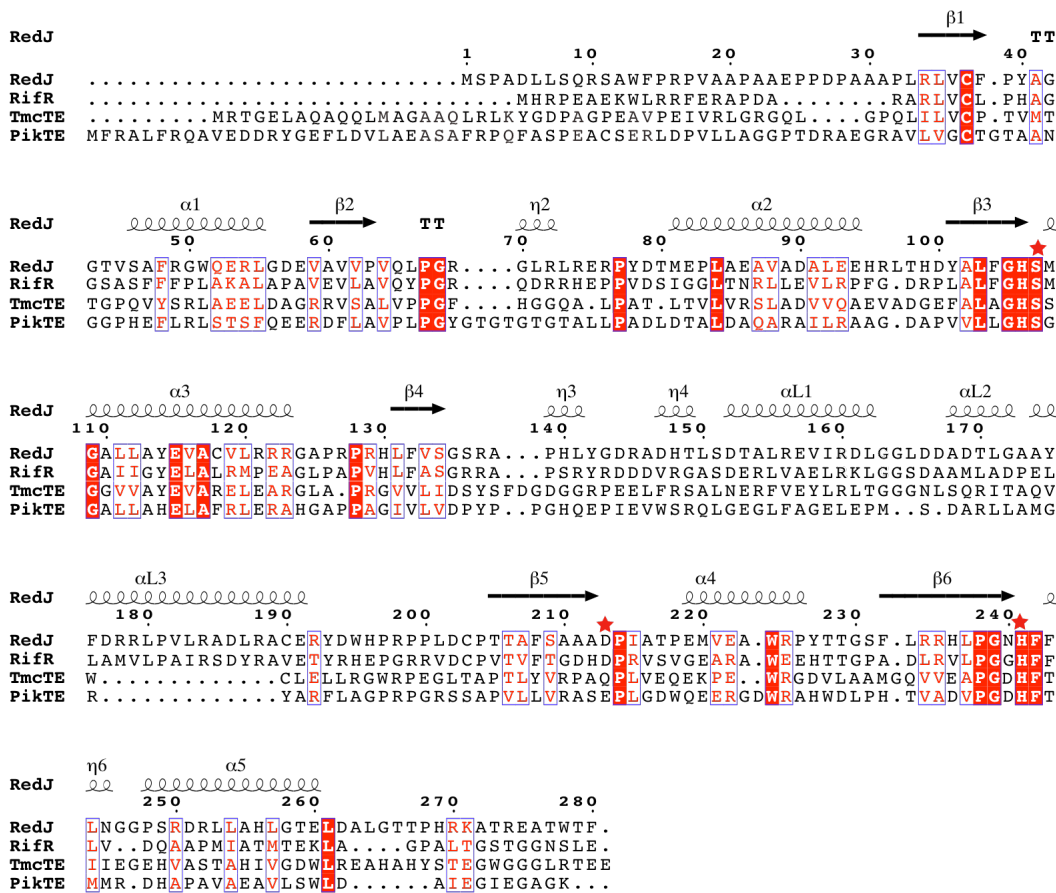

Figure S3. Structure-based multiple sequence alignment of RedJ (accession NP\_630015) with the TE II from the rifamycin pathway in *Amycolatopsis mediterranei* (RifR, 38% sequence identity to RedJ, accession AAG52991), the TE I from the tautomycetin pathway of *Streptomyces griseochromogenes* (TmcTE, 14% identity to RedJ, accession ABI94380), and the TE I from the pikromycin pathway of *Streptomyces venezuelae* (PikTE, 15% identity to RedJ, accession AAC69332). RedJ and RifR catalytic triad residues are designated with red stars. The Asp residue of the catalytic triad in TmcTE and PikTE is analogous to Gly135 in RedJ. Sequence alignment was generated with MUSCLE (Edgar, R.C., *Nucleic Acids Res*, 2004. 32: p. 1792-7). Invariant residues are in white with a red background, other conserved sites are in red. No conservation is highlighted in regions that lack structure similarity: the N-termini and the lid (RedJ residues 144-192). ESPript (Gouet, P. *et al.*, *Bioinformatics*, 1999. 15: 305-8) was used to generate secondary structure annotations for RedJ.

**A**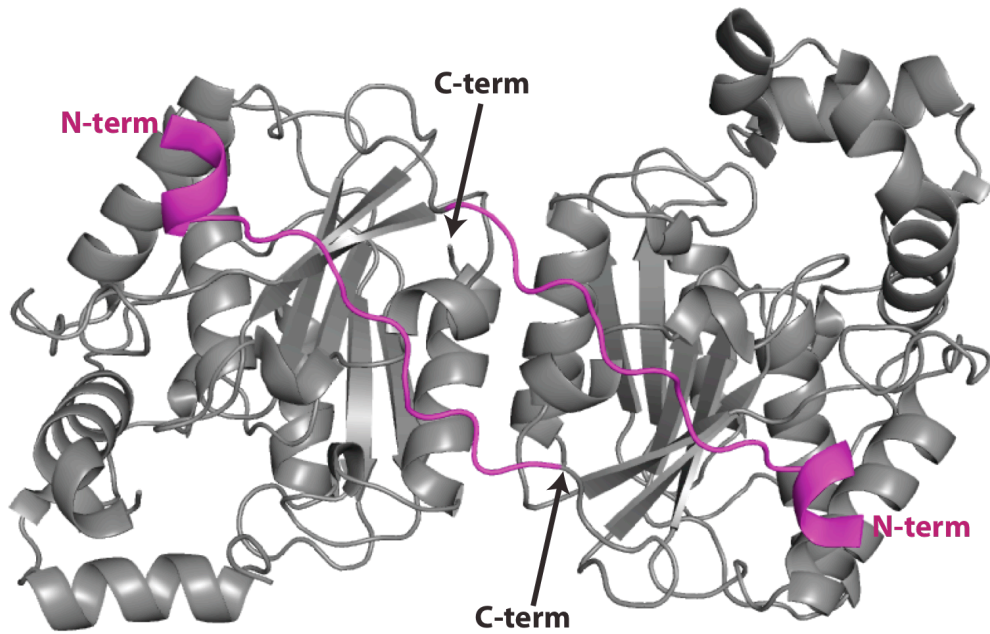**B**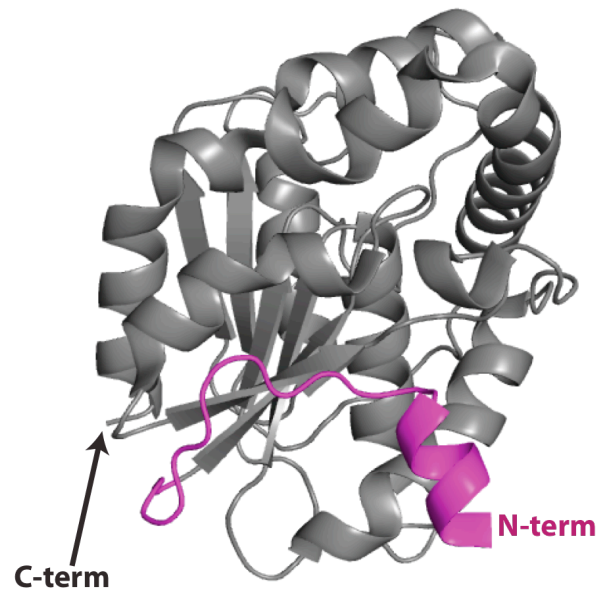

Figure S4. A. Domain-swapped RedJ<sub>T</sub> dimer. The domain-swapped N-terminus (residues 9-24) is shown in magenta. B. RifR structure (Claxton et al., *J Biol Chem*, 2009. 284: p. 5021-5029). RifR residues 2-20, homologous to residues 6-24 of RedJ, are shown in magenta.

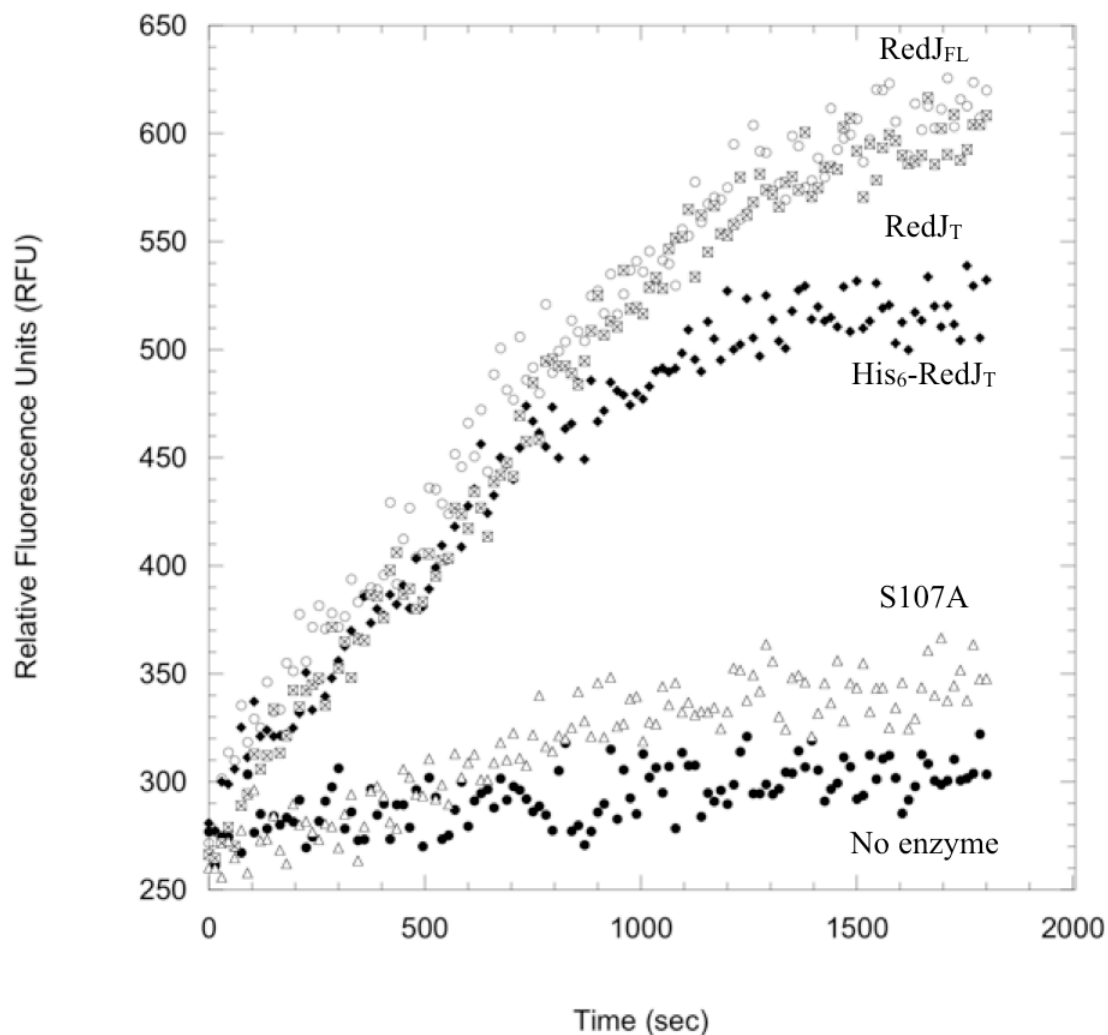

Figure S5. Catalytic activity of full-length and truncated RedJ. Example traces are shown for RedJ<sub>FL</sub> (○), His<sub>6</sub>-RedJ<sub>T</sub> (◆), TEV-cleaved RedJ<sub>T</sub> (⊠), no RedJ (●), and TEV-cleaved RedJ<sub>T</sub> S107A (△), in which the catalytic serine was substituted with an alanine. The activities were determined using ThioGlo 1 (Calbiochem). Reducing agents were removed from all recombinant RedJ solutions by exchange into buffer A. The 110 μL reaction mixture (10 μM decanoyl-RedQ, 10 μM ThioGlo reagent, and 0.1 M potassium phosphate buffer pH 7.4) was pre-incubated for 5 min at room temperature in a black 96-well Greiner plate. Recombinant RedJ (1 μM) was added to initiate the reaction and fluorescence measurements ( $\lambda_{\text{ex}}=379$  nm and  $\lambda_{\text{em}}=513$  nm) were taken every 15 sec for 30 min at 37°C. Initial slopes of each line were determined to compare levels of activity. RedJ<sub>FL</sub> and TEV-cleaved RedJ<sub>T</sub> have similar activity. His<sub>6</sub>-RedJ<sub>T</sub> has approximately 70% of the activity of RedJ<sub>FL</sub>.

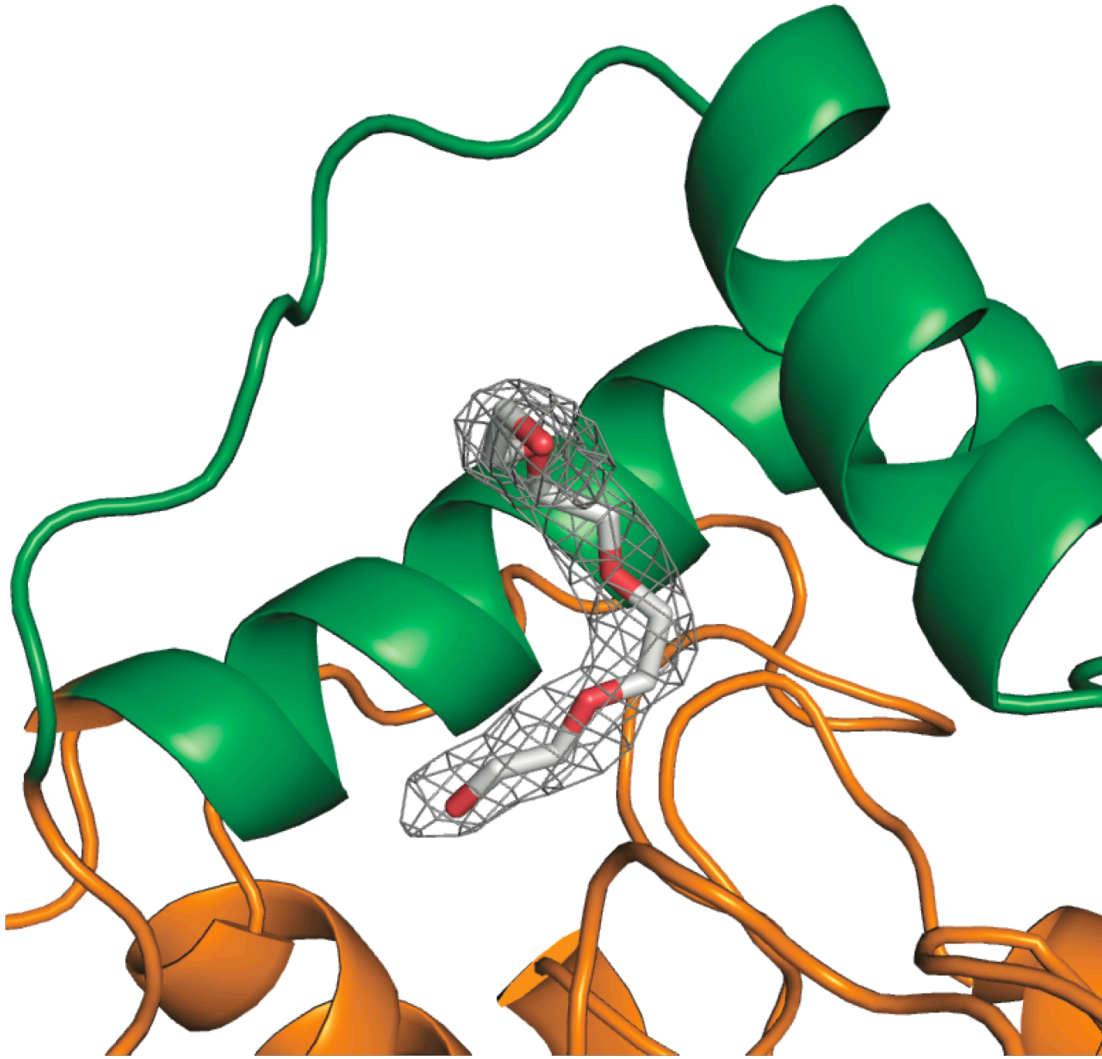

Figure S6. *Fo-Fc* omit map contoured at  $1\sigma$  for the polyethylene glycol molecule bound in the hydrophobic pocket of RedJ.

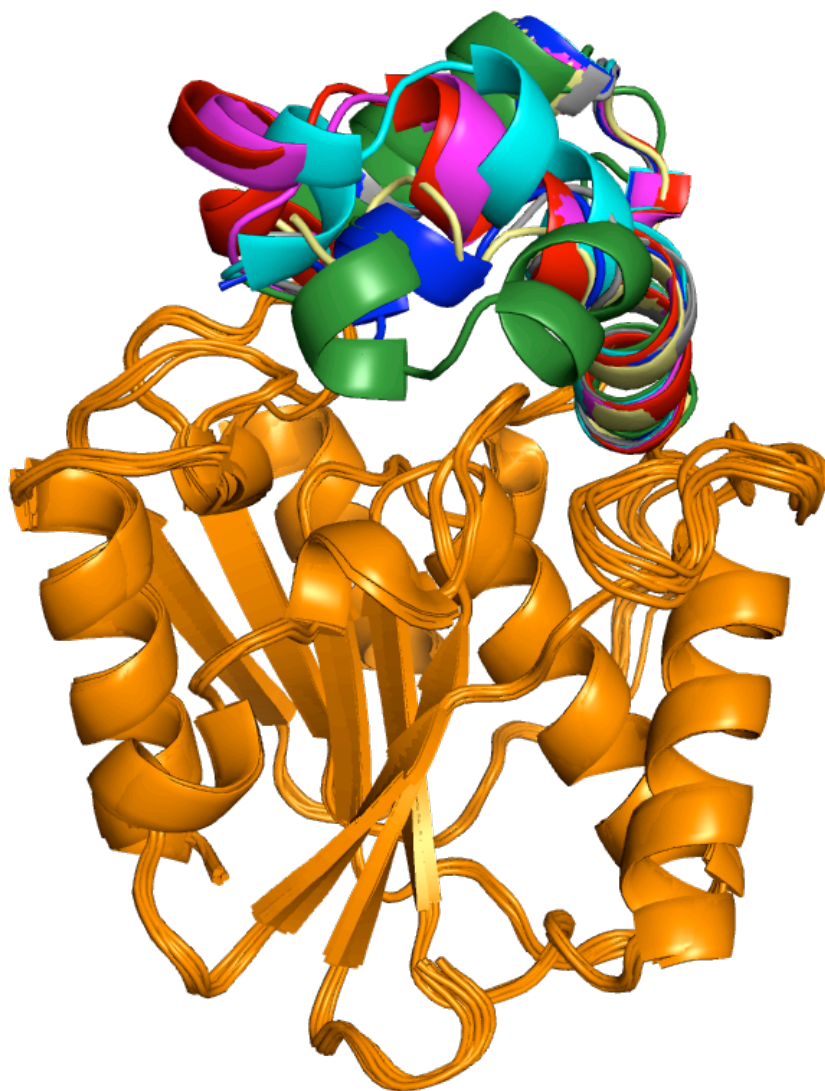

Figure S7. Superposition of the eight RedJ molecules from the RedJ<sub>T</sub> and SeMet His<sub>6</sub>-RedJ<sub>T</sub> crystal structures. The core domain is orange, the lid domain in the open-entrance conformation is cyan, the lid domain in the closed entrance conformation is green, and the lid domains in the intermediate conformation are red, magenta, yellow, and blue. The positions of  $\alpha$ L2 and residues 173-179 of  $\alpha$ L3 are not shown for two of the RedJ molecules due to disorder.



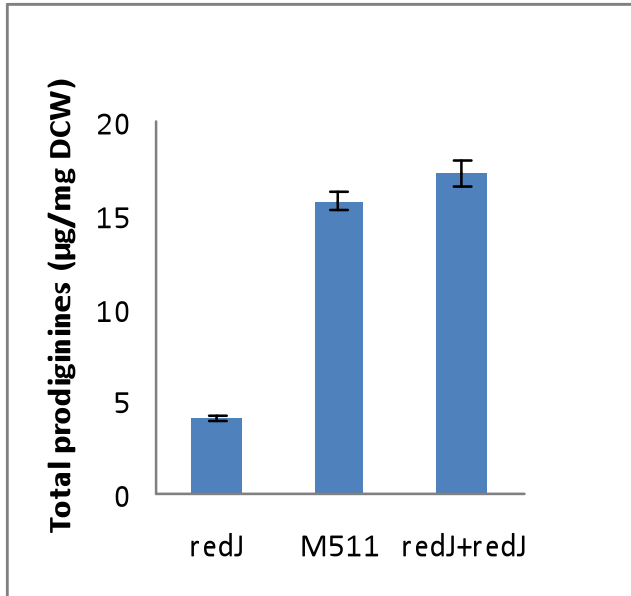

Figure S8. Levels of total prodiginine production in wild type *S. coelicolor* (M511), a *redJ* deletion mutant of the M511 strain (redJ) and the genetically complemented mutant (redJ+redJ).

```

StreptomycesFabC   MAATQEEIVAGLADIVNEIAGIPVEDVQLDKSFTDDLVDLSMVEVVVAAEERFDVKIP 60
E.coliAcpP         MSTIEERVKKIIGEQL----GVKQEEVTNNASFVEDLGADSLDTVELVMALEEEFDTEIP 56
RedQ               MSTTYDKLVDLLVDGF----AVDRAAIRPDVTF--EELEMSLFLVELLLVIQSEFGVKIS 55

StreptomycesFabC   DEDVKNIKTVGDATEYILKHQA---- 82
E.coliAcpP         DEEAEKIITTVQAAIDYINGHQA---- 78
RedQ               DDAAVPTDTIAHAVALVDNEIAATAS 81

```

Figure S9. Sequence alignment of FabC (accession NP\_626635), AcpP (accession AAB27925), and RedQ (accession NP\_630008) generated by clustalw (Chena *et al.*, Nucleic Acids Res, 2003. 13: p. 3497-500). The blue box indicates the residues of FabC in the additional helical turn at the C-terminus of helix 1. The red boxes indicate residues on  $\alpha$ -helix 3 that are proposed to either prevent (FabC) or promote (RedQ and AcpP) interaction with RedJ.
